# Supplementary material for: Hydrogen Protection Boosts the Bioactivity of Chrysanthemum morifolium Extract in Preventing Palmitate-Induced Endothelial Dysfunction by Restoring MFN2 and Alleviating Oxidative Stress in HAEC Cells
Source: MDPI journal article supplement (doi:10.3390/antiox12051019), 2023-04-28
Supplement: s1 [file s1]

**Supplementary Table S1. Primary antibodies used for western blot analysis.**

| <b>Target Protein</b> | <b>Company (Cat. No.)</b> | <b>Molecular Weight (KD)</b> | <b>Dilutions</b> |
|-----------------------|---------------------------|------------------------------|------------------|
| eNOS                  | Abcam (ab199956)          | 140                          | 1:1000           |
| p-eNOS (S1177)        | Abcam (ab215717)          | 140                          | 1:1000           |
| DRP1                  | Santa Cruz (sc-271583)    | 82                           | 1:500            |
| MFN1                  | Santa Cruz (sc-166644)    | 86                           | 1:500            |
| MFN2                  | Santa Cruz (sc-100560)    | 86                           | 1:500            |
| OPA1                  | BD (612606)               | 90                           | 1:1000           |
| ATP5A                 | Invitrogen (459240)       | 54                           | 1:1000           |
| MTCO1                 | Invitrogen (459600)       | 37                           | 1:1000           |
| UQCRC1                | Invitrogen (459140)       | 50                           | 1:2000           |
| SDHB                  | Invitrogen (459230)       | 30                           | 1:2000           |
| NDUFS3                | Invitrogen (459130)       | 26                           | 1:1000           |
| NRF2                  | Santa Cruz (sc-365949)    | 61                           | 1:500            |
| KEAP1                 | Cell Signaling (46778S)   | 60                           | 1:1000           |
| NQO1                  | Santa cruz (sc-376023)    | 31                           | 1:500            |
| CATALASE              | Cell Signaling (14097S)   | 60                           | 1:1000           |
| SOD1                  | Santa cruz (sc-101523)    | 22                           | 1:500            |
| SOD2                  | Santa cruz (sc-137254)    | 23                           | 1:500            |
| GAPDH                 | Cell Signaling (2118S)    | 37                           | 1:3000           |
| HISTONE-H3            | Abcam (ab1791)            | 17                           | 1:1000           |

**Supplementary Table S2. Primers used for qPCR.**

| Target Gene                           | Forward (5'-3')        | Reverse (5'-3')         |
|---------------------------------------|------------------------|-------------------------|
| Human <i><math>\beta</math>-ACTIN</i> | CATGTACGTTGCTATCCAGGC  | ACATGACTGGGTCCAAGTTGT   |
| Human <i>IL6</i>                      | TTTTGTACTCATCTGCACAGC  | GGATTCAATGAGGAGACTTGC   |
| Human <i>MMP1</i>                     | ACGCCAGATTTGCCAAGAG    | TTGACCCTCAGAGACCTTGGT   |
| Human <i>CHOP</i>                     | GGAAACAGAGTGGTCATTCCC  | CTGCTTGAGCCGTTTCATTCTC  |
| Human <i>XBPI</i>                     | CCCTCCAGAACATCTCCCCAT  | ACATGACTGGGTCCAAGTTGT   |
| Human <i>GRP78</i>                    | GAAAGAAGGTTACCCATGCAGT | CAGGCCATAAGCAATAGCAGC   |
| Human <i>GRP94</i>                    | GCTGACGATGAAGTTGATGTGG | CATCCGTCCTTGATCCTTCTCTA |
| Human <i>NRF2</i>                     | TCCAGTCAGAAACCAGTGGAT  | GAATGTCTGCGCCAAAAGCTG   |
| Human <i>SOD2</i>                     | GCAGTGTGCGGCACCAGCAG   | TCCCTTGGCCAACGCCTCCT    |
| Human <i>18S rRNA</i>                 | CAGCCACCCGAGATTGAGCA   | TAGTAGCGACGGGCGGTGTG    |
| Human <i>D-LOOP</i>                   | CAGTACCTAACAAACCCACA   | GAGGTCGTAAACCCTATTGT    |

**Supplementary Table S3. siRNAs used for transfection.**

| Target Gene       | Sense (5'-3')        | Antisense (5'-3')     |
|-------------------|----------------------|-----------------------|
| Human <i>MFN2</i> | GGCCAAACAUCUUAUCCUTT | AGGAUGAAGAUGUUUGGCCTT |
| Human <i>SOD2</i> | GGGUUGGCUUGGUUCAAUTT | AUUGAAACCAAGCCAACCCTT |

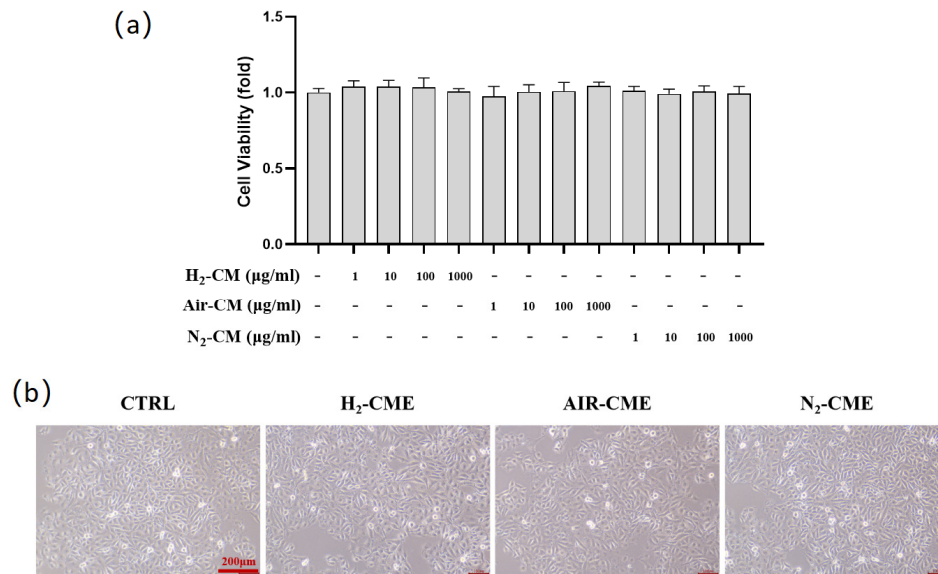

**Supplementary Figure S1. Effects of CME on cell viability and morphology in HAEC cells.**

(a) HAECs were treated with CME for 24 hours. Cell viability was measured by MTT assay. n= 6.

(b) HAECs were treated with 1000 µg/ml CME for 24 h. Observation of cell morphology using an inverted microscope. Magnification: ×10. Scale bar = 200 µm.

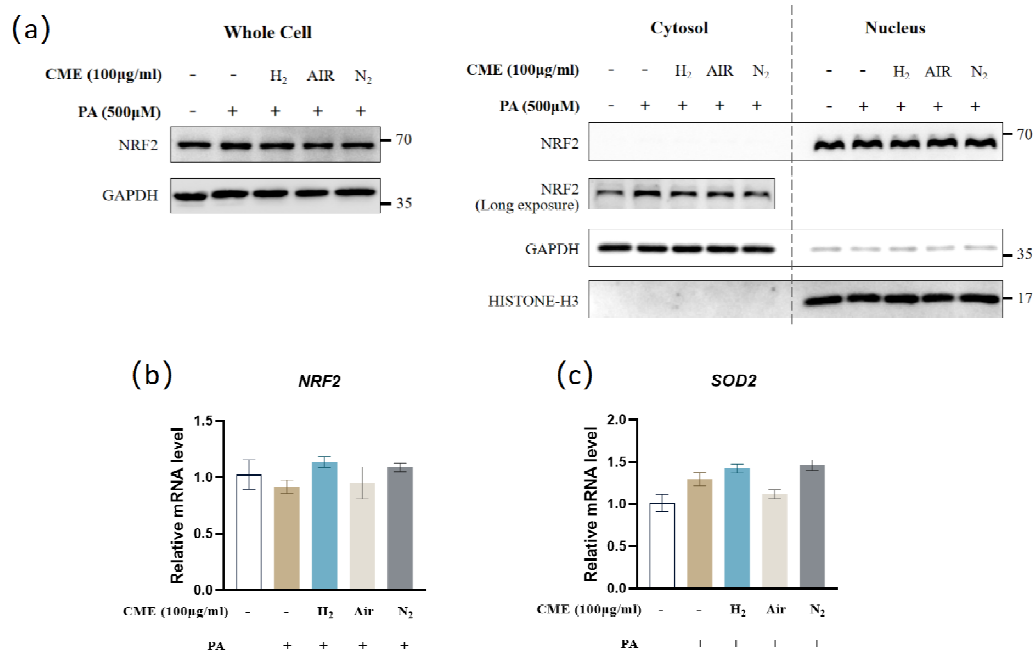

**Supplementary Figure S2. Nuclear translocation of NRF2 and mRNA levels of *NRF2* and *SOD2* in response to CME pretreatment and PA challenge in HAEC cells.**

HAECs were pretreated with 100 µg/ml CME for 24 h, followed by 500 µM PA or BSA treatment for another 24 h.

(a) Western blot analysis of nuclear translocation of NRF2.

(b-c) mRNA level of *NRF2* (b) and *SOD2* (c) was measured by qRT-PCR. n=4.
